# Supplementary material for: Deep Resequencing of GWAS Loci Identifies Rare Variants in CARD9, IL23R and RNF186 That Are Associated with Ulcerative Colitis
Source: PLoS Genet. 2013 Sep 12;9(9):e1003723. doi: 10.1371/journal.pgen.1003723 (PMC3772057; doi:10.1371/journal.pgen.1003723)
Supplement: Table S7 — Table of datasets available in public domain that were processed and analyzed for RNF186 expression. (XLSX) [file pgen.1003723.s021.xlsx]

## Sheet: Supporting Table 7
Dataset #	GEO Series ID	Dataset Description	Platform ID	Platform Description
1	GSE3365	CD/UC PBMCs vs healthy subjects	GPL96	[HG-U133A] Affymetrix Human Genome U133A Array
2	GSE20881	CD colon biopsies vs healthy controls	GPL1708	Agilent-012391 Whole Human Genome Oligo Microarray G4112A
3	GSE11223	UC colon biopsies vs healthy controls	GPL1708	Agilent-012391 Whole Human Genome Oligo Microarray G4112A
4	GSE6383	Mouse small intestine epithelium vs. mesenchyme	GPL1261	[Mouse430_2] Affymetrix Mouse Genome 430 2.0 Array
5	GSE9785	Shigella flexneri infected mouse intestine tissue	GPL339	[MOE430A] Affymetrix Mouse Expression 430A Array
6	GSE34151	Human DCs stimulated with MTB vs mock	GPL10558	Illumina HumanHT-12 V4.0 expression beadchip
7	GSE3116	HNF4 null to control colons	GPL339	[MOE430A] Affymetrix Mouse Expression 430A Array
8	GSE11759	HNF4alpha conditional k.o in mouse epithelial colon vs controls	GPL1261	[Mouse430_2] Affymetrix Mouse Genome 430 2.0 Array
